# Supplementary material for: Prognostic Role of Neutrophil, Monocyte and Platelet to Lymphocyte Ratios in Advanced Ovarian Cancer According to the Time of Debulking Surgery
Source: MDPI journal article supplement (doi:10.3390/ijms241411420), 2023-07-13

**Supplementary Material**

**Figure S1:** Kaplan Meier of overall survival (OS) and progression-free survival (PFS) according the type of surgery performed, primary debulking surgery (PDS) or interval debulking surgery (IDS).

A) OS according type of surgery performed

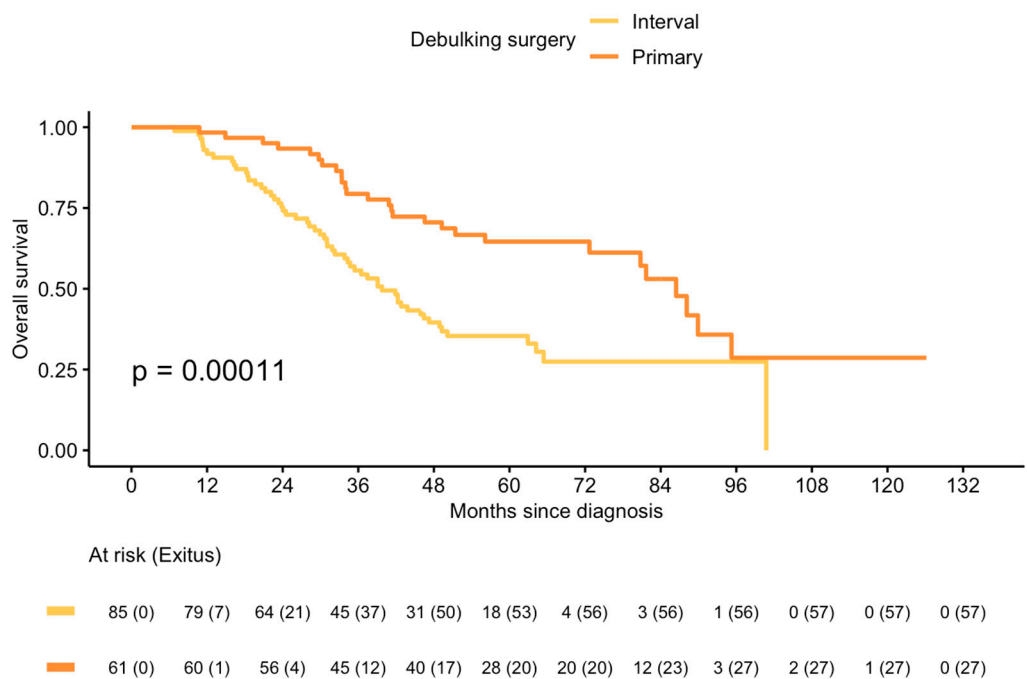

B) PFS according type of surgery performed

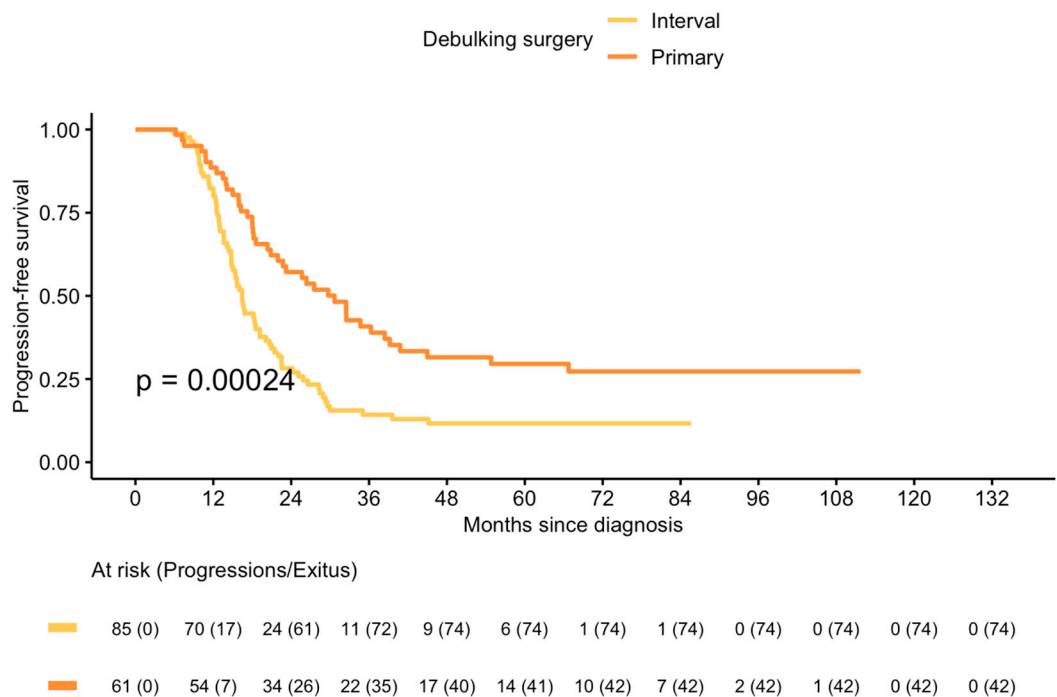

**Table S1:** Univariate Cox models for the risk of death, and the combined event progression/death, in the PDS subgroup.

| Variables        | Univariate analysis for OS |         | Univariate analysis for PFS |         |
|------------------|----------------------------|---------|-----------------------------|---------|
|                  | HR (95% CI)                | p-value | HR (95% CI)                 | p-value |
| Age (years)      | 1.04 (1.00-1.08)           | 0.047   | 1.02 (1.00-1.05)            | 0.089   |
| FIGO stage       |                            | 0.045   |                             | 0.014   |
| III              | 1                          |         | 1                           |         |
| IV               | 2.29 (1.02-5.12)           |         | 2.36 (1.19-4.69)            |         |
| BRCA ½           |                            | 0.117   |                             | 0.381   |
| Mutated          | 1                          |         | 1                           |         |
| WT / Unknown     | 2.21 (0.82-5.95)           |         | 1.39 (0.66-2.91)            |         |
| Residual disease |                            | 0.006   |                             | 0.001   |
| R0               | 1                          |         | 1                           |         |
| R1/2             | 3.33 (1.40-7.93)           |         | 4.04 (2.02-8.09)            |         |
| NLR              |                            | 0.024   |                             | 0.054   |
| ≤ 3.1            | 1                          |         | 1                           |         |
| > 3.1            | 2.63 (1.14-6.06)           |         | 1.82 (0.99-3.36)            |         |
| MLR              |                            | 0.089   |                             | 0.057   |
| ≤ 0.4            | 1                          |         | 1                           |         |
| > 0.4            | 1.94 (0.90-4.17)           |         | 1.80 (0.98-3.31)            |         |
| PLR              |                            | 0.007   |                             | 0.017   |
| ≤ 193.1          | 1                          |         | 1                           |         |
| > 193.1          | 3.32 (1.40-7.89)           |         | 2.13 (1.15-3.96)            |         |

OS: overall survival; PFS: progression free survival; NLR: neutrophil-to-lymphocyte ratio; MLR: monocyte-to-lymphocyte ratio; PLR: platelet-to-lymphocyte-ratio; HR: hazard ratio.

**Table S2:** Univariate Cox models for the risk of death, and the combined event progression/death, in the IDS subgroup.

| Variables        | Univariate analysis for OS |         | Univariate analysis for PFS |         |
|------------------|----------------------------|---------|-----------------------------|---------|
|                  | HR (95% CI)                | p-value | HR (95% CI)                 | p-value |
| Age (years)      | 1.01 (0.98-1.04)           | 0.613   | 0.98 (0.95-1.01)            | 0.137   |
| FIGO stage       |                            | 0.048   |                             | 0.314   |
| III              | 1                          |         | 1                           |         |
| IV               | 1.71 (1.01-2.91)           |         | 1.27 (0.80-2.04)            |         |
| BRCA ½           |                            | 0.008   |                             | 0.021   |
| Mutated          | 1                          |         | 1                           |         |
| WT / Unknown     | 3.50 (1.39-8.78)           |         | 2.13 (1.12-4.07)            |         |
| Residual disease |                            | 0.153   |                             | 0.117   |
| R0               | 1                          |         | 1                           |         |
| R1/2             | 1.58 (0.84-2.95)           |         | 1.58 (0.89-2.80)            |         |
| NLR              |                            | 0.760   |                             | 0.473   |
| ≤ 4.3            | 1                          |         | 1                           |         |
| > 4.3            | 1.09 (0.64-1.84)           |         | 1.18 (0.75-1.87)            |         |
| MLR              |                            | 0.867   |                             | 0.921   |
| ≤ 0.4            | 1                          |         | 1                           |         |

|       |                  |       |                  |       |
|-------|------------------|-------|------------------|-------|
| > 0.4 | 0.96 (0.57-1.62) |       | 1.02 (0.65-1.62) |       |
| PLR   |                  | 0.326 |                  | 0.561 |
| ≤ 315 | 1                |       | 1                |       |
| > 315 | 0.77 (0.45-1.30) |       | 0.87 (0.55-1.38) |       |

OS: overall survival; PFS: progression free survival; NLR: neutrophil-to-lymphocyte ratio; MLR: monocyte-to-lymphocyte ratio; PLR: platelet-to-lymphocyte-ratio; HR: hazard ratio.

**Table S3:** Median baseline and post-treatment NLR, MLR and PLR.

| PDS<br>N = 51 (39%) | Baseline            | Post-treatment      | p-value   |
|---------------------|---------------------|---------------------|-----------|
| NLR: median [IQR]   | 3.1 [2.1;4.1]       | 1.7 [1.3;2.2]       | p < 0.001 |
| MLR: median [IQR]   | 0.4 [0.3;0.5]       | 0.3 [0.3;0.4]       | p=0.112   |
| PLR: median [IQR]   | 211.2 [147.0;296.2] | 147.5 [111.3;192.0] | p < 0.001 |
| IDS<br>N = 80 (61%) | Baseline            | Post-treatment      | p-value   |
| NLR: median [IQR]   | 4.3 [2.9;6.3]       | 1.6 [1.2;2.4]       | p < 0.001 |
| MLR: median [IQR]   | 0.5 [0.3;0.7]       | 0.3 [0.2;0.4]       | p < 0.001 |
| PLR: median [IQR]   | 315.4 [202.6;437.7] | 138.2 [94.7;177.4]  | p < 0.001 |

PDS: primary debulking surgery; IDS: interval debulking surgery; NLR: neutrophil-to-lymphocyte ratio; MLR: monocyte-to-lymphocyte ratio; PLR: platelet-to-lymphocyte-ratio; IQR: interquartile range.

**Figure S2:** Kaplan Meier of OS and PFS according to increase/decrease of NLR, MLR and PLR in PDS.

A) OS according NLR high/low

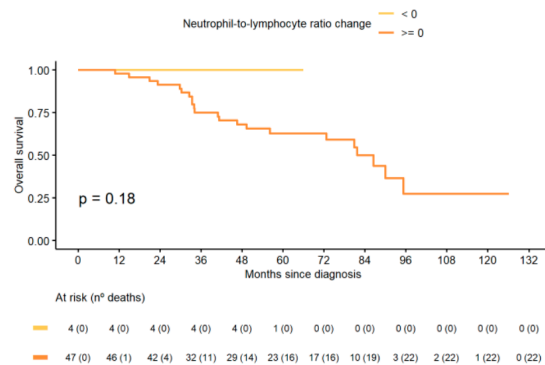

B) PFS according NLR high/low

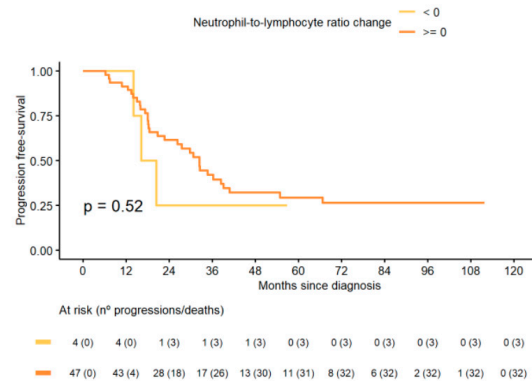

C) OS according MLR high/low

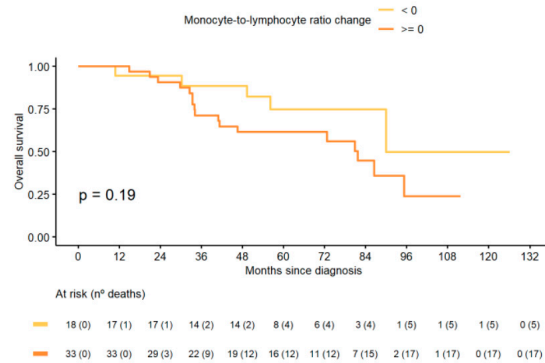

D) PFS according MLR high/low

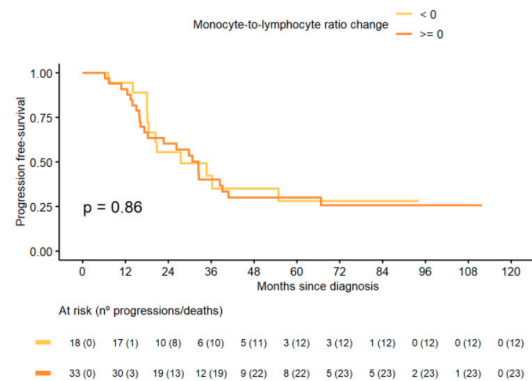

E) OS according PLR high/low

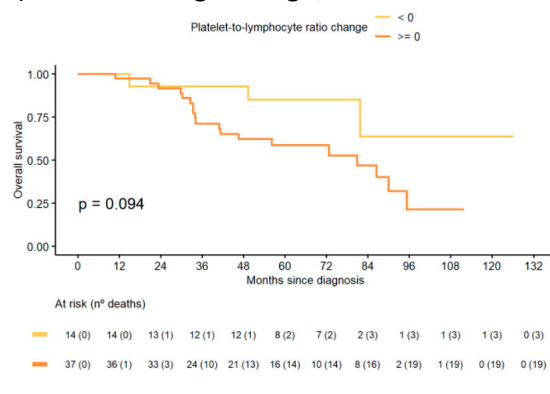

F) PFS according PLR high/low

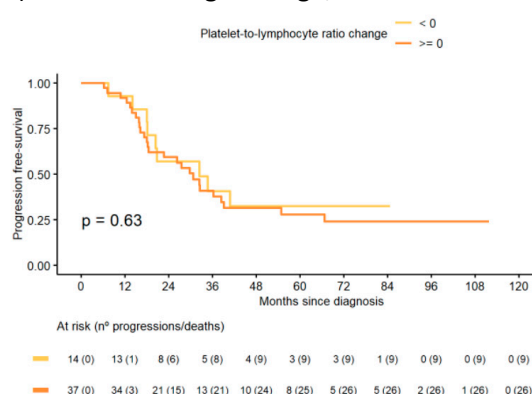

**Figure S3:** Kaplan Meier of OS and PFS according to increase/decrease of NLR, MLR and PLR in IDS.

A) OS according NLR high/low

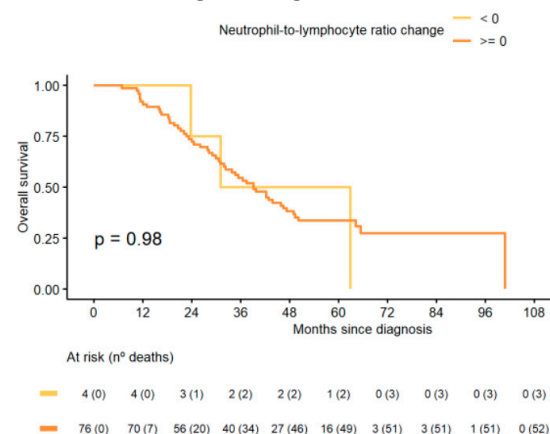

B) PFS according NLR high/low

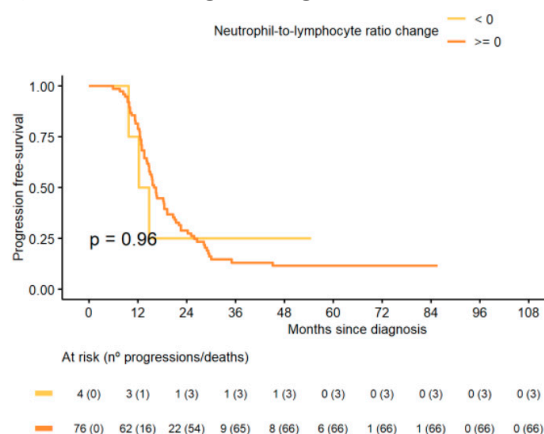

C) OS according MLR high/low

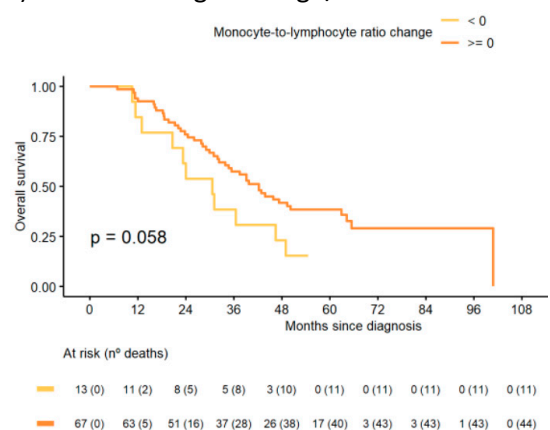

D) PFS according MLR high/low

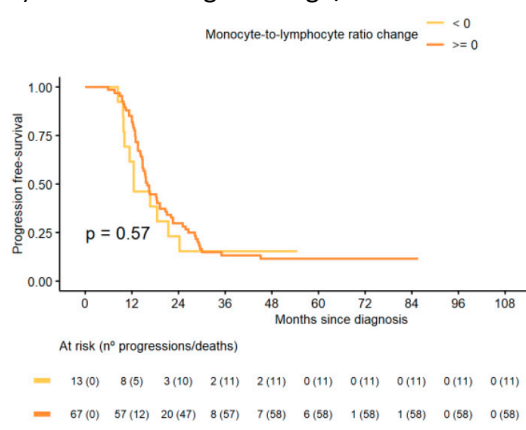

E) OS according PLR high/low

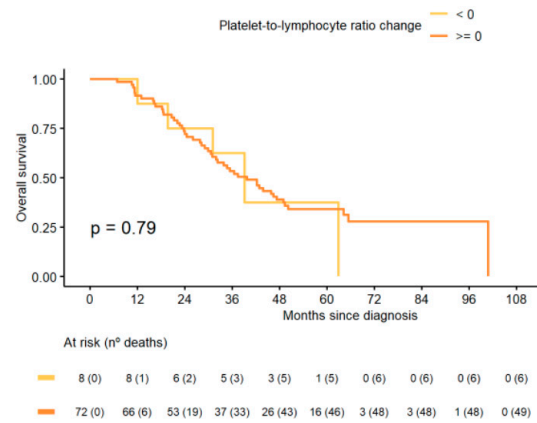

F) PFS according PLR high/low

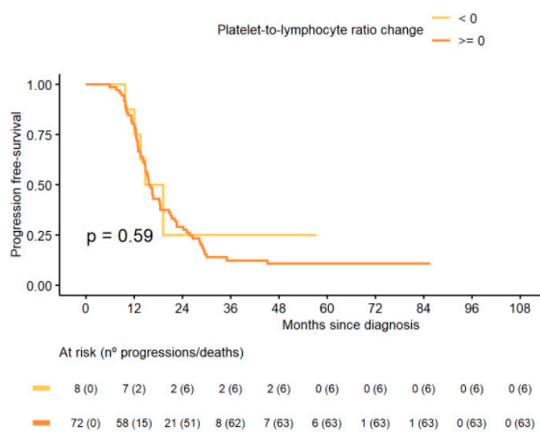

Supplement: s1 [file s1]
